# Supplementary material for: Investigating ripple pattern formation and damage profiles in Si and Ge induced by 100 keV Ar+ ion beam: a comparative study
Source: publisher site journal article supplement (doi:10.3762/bjnano.15.33), 2024-04-05

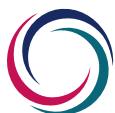

## Supporting Information

for

### **Investigating ripple pattern formation and damage profiles in Si and Ge induced by 100 keV Ar<sup>+</sup> ion beam: a comparative study**

Indra Sulania, Harpreet Sondhi, Tanuj Kumar, Sunil Ojha, G R Umapathy, Ambuj Mishra, Ambuj Tripathi, Richa Krishna, Devesh Kumar Avasthi and Yogendra Kumar Mishra

*Beilstein J. Nanotechnol.* **2024**, *15*, 367–375. [doi:10.3762/bjnano.15.33](https://doi.org/10.3762/bjnano.15.33)

## Supplementary files

1. Si samples after irradiation at  $10 \times 10 \mu\text{m}^2$

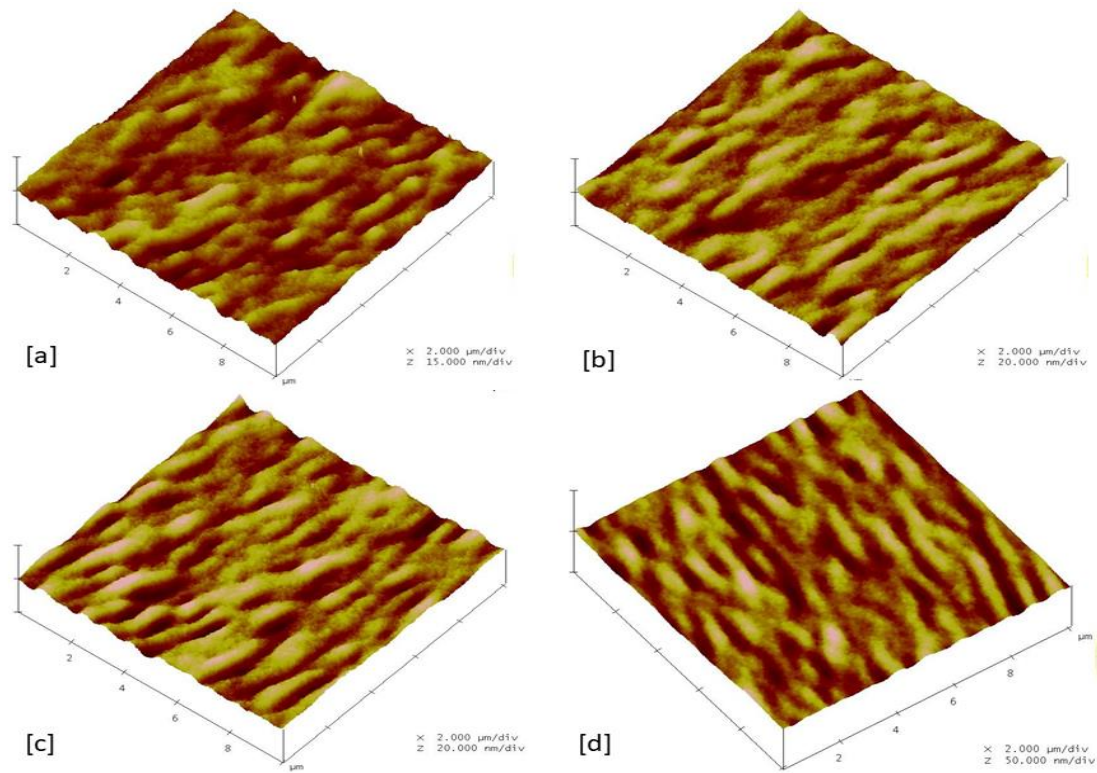

2. Ge samples after irradiation at  $10 \times 10 \mu\text{m}^2$

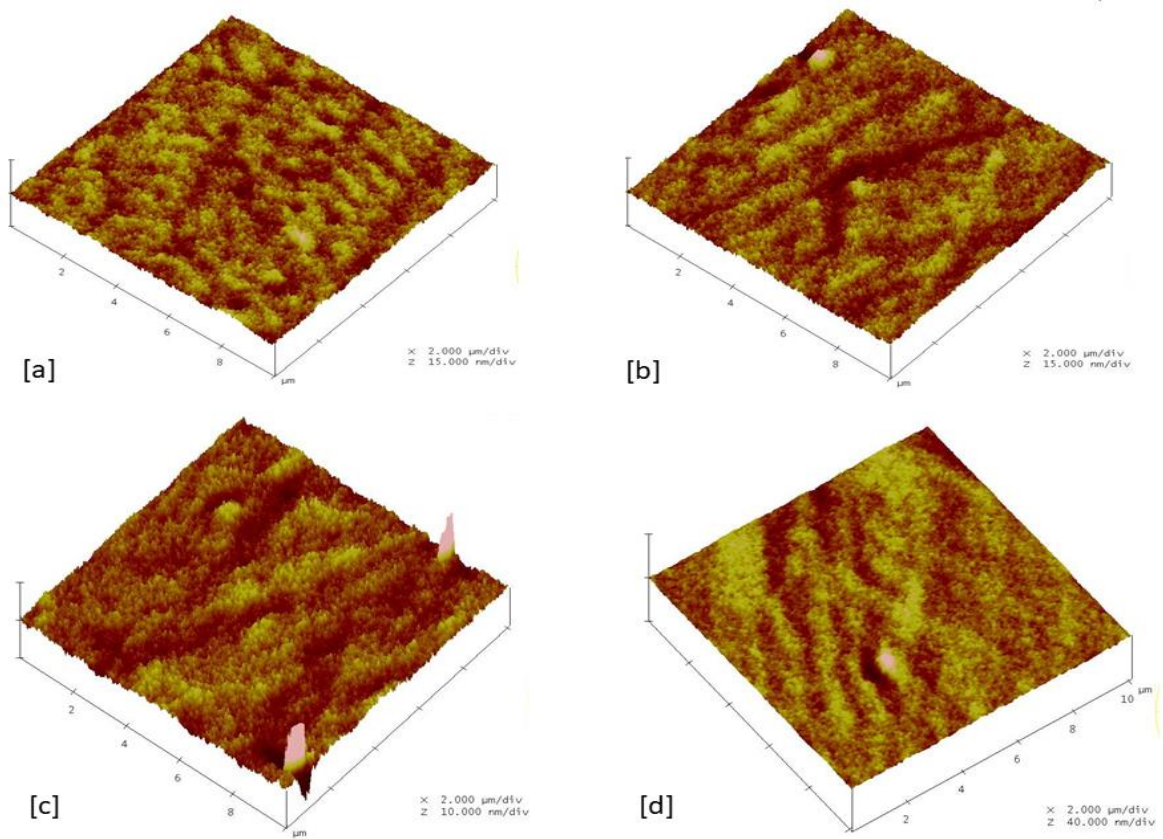

Supplement: Additional file 1 [file 2190-4286-15-33-S1.pdf]
